# Supplementary material for: Atrial Fibrillation: A New Indicator for Advanced Colorectal Neoplasia in Screening Colonoscopy
Source: MDPI journal article supplement (doi:10.3390/jcm8071083), 2019-07-23
Supplement: s1 [file s1]

Supplementary Table 1. Additional Findings on Colonoscopy.

|                                                | All Participants | Non-AF Group |             |             | AF Group   | Statistical Comparison<br>AF vs. Non-AF |             |             |
|------------------------------------------------|------------------|--------------|-------------|-------------|------------|-----------------------------------------|-------------|-------------|
|                                                |                  | Unmatched    | 1:1 Matched | 3:1 Matched |            | Unmatched                               | 1:1 Matched | 3:1 Matched |
| Number of Participants                         | 1949             | 1903         | 46          | 138         | 46         | -                                       | -           | -           |
| <b>ANY COLONIC LESION*</b>                     |                  |              |             |             |            |                                         |             |             |
| Number of Colonic Lesion per Participant       |                  |              |             |             |            |                                         |             |             |
| 0                                              | 1366 (70.1%)     | 1349 (70.9%) | 34 (73.9%)  | 93 (67.4%)  | 17 (37.0%) | <0.001                                  | 0.005       | <0.001      |
| 1                                              | 358 (18.4%)      | 342 (18.0%)  | 7 (15.2%)   | 27 (19.6%)  | 16 (34.8%) |                                         |             |             |
| ≥ 2                                            | 224 (11.5%)      | 211 (11.1%)  | 5 (10.9%)   | 19 (13.8%)  | 13 (28.2%) |                                         |             |             |
| Size of Largest Colonic Lesion per Participant |                  |              |             |             |            |                                         |             |             |
| < 5 mm                                         | 462 (23.7%)      | 450 (23.6%)  | 7 (15.2%)   | 36 (26.0%)  | 13 (28%)   | <0.001                                  | 0.021       | 0.017       |
| ≥ 5 - <10 mm                                   | 107 (5.5%)       | 98 (5.1%)    | 8 (17.4%)   | 14 (10.1%)  | 10 (21.7%) |                                         |             |             |
| ≥ 10 mm                                        | 60 (3.1%)        | 56 (2.9%)    | 0           | 2 (1.4%)    | 4 (8.7%)   |                                         |             |             |
| <b>ADENOMAS</b>                                |                  |              |             |             |            |                                         |             |             |
| Number of Tubular Adenomas per Participant     |                  |              |             |             |            |                                         |             |             |
| 0                                              | 1444 (74.1%)     | 1415 (74.4%) | 34 (73.9%)  | 98 (71.0%)  | 29 (63.0%) | <0.001                                  | 0.231       | 0.058       |
| 1                                              | 316 (16.2%)      | 309 (16.2%)  | 7 (15.2%)   | 26 (18.8%)  | 7 (15.2%)  |                                         |             |             |
| ≥ 2                                            | 188 (9.6%)       | 178 (9.4%)   | 5 (10.9%)   | 14 (10.1%)  | 10 (21.7%) |                                         |             |             |
| Number of Advanced Adenomas per Participant    |                  |              |             |             |            |                                         |             |             |
| 0                                              | 1867 (95.8%)     | 1823 (95.8%) | 46          | 134 (97.1%) | 44 (95.7%) | 0.067                                   | 0.360       | 0.215       |

|   |           |           |   |          |          |
|---|-----------|-----------|---|----------|----------|
| 1 | 70 (3.6%) | 69 (3.6%) | 0 | 4 (2.9%) | 1 (2.2%) |
| 2 | 6 (0.3%)  | 6 (0.3%)  | 0 | 0        | 0        |
| 3 | 5 (0.3%)  | 4 (0.2%)  | 0 | 0        | 1 (2.2%) |

| <i><b>DIVERTICULOSIS</b></i> |              |              |            |            |            |              |       |       |
|------------------------------|--------------|--------------|------------|------------|------------|--------------|-------|-------|
| Severity                     |              |              |            |            |            |              |       |       |
| None                         | 1152 (59.1%) | 1131 (59.4%) | 25 (54.3%) | 66 (75.9%) | 21 (45.7%) | <b>0.010</b> | 0.507 | 0.275 |
| Mild                         | 421 (21.6%)  | 409 (21.5%)  | 10 (21.7%) | 33 (23.9%) | 12 (26.1%) |              |       |       |
| Intermediate                 | 142 (7.3%)   | 141 (7.4%)   | 3 (6.5%)   | 14 (10.1%) | 1 (2.2%)   |              |       |       |
| Severe                       | 234 (12.0%)  | 222 (11.7%)  | 8 (17.4%)  | 25 (18.1%) | 12 (26.1%) |              |       |       |
| Extent of Diverticulosis     |              |              |            |            |            |              |       |       |
| Sigmoid Only                 | 475 (25.2%)  | 461 (59.9%)  | 13 (61.9%) | 43 (59.7%) | 14 (56.0%) | <b>0.049</b> | 0.664 | 0.627 |
| > Sigmoid                    | 99 (5.2%)    | 93 (12.1%)   | 3 (14.3%)  | 10 (13.9%) | 6 (24.0%)  |              |       |       |
| Whole Colon Affected         | 221 (11.7%)  | 216 (28.0%)  | 5 (23.8%)  | 19 (26.4%) | 5 (20%)    |              |       |       |

Numbers are given as number (percentage). The level of significance was set at 0.05 and significant differences are marked in bold. \*including hyperplastic polyps, adenoma, advanced neoplasia.
